# Supplementary material
Source: HighWire-hosted journal article supplement (https://jnm.snmjournals.org/highwire/filestream/93965/field_highwire_adjunct_files/0/54189_Supp.pdf)
Supplement: 54189_Supp.pdf [file 54189_Supp.pdf]

## Supplemental Data: Equations and Parameters

### Model equations

The following equations describe the transport of labeled and unlabeled antibody to the antigen sites, its binding, degradation, and radioactive decay.

The variables are defined in Table A. Index *i* refers to all organs except for liver (L) and plasma (P); the asterisk labels the radiolabeled species.

$$\begin{aligned} \frac{d}{dt} AgAb_i &= k_{nonl} \cdot Ab_i - k_{off} \cdot AgAb_i - \lambda_{db} \cdot AgAb_i + \lambda_{phy} \cdot AgAb_i^* \\ \frac{d}{dt} AgAb_i^* &= k_{nonl} \cdot Ab_i^* - k_{off} \cdot AgAb_i^* - \lambda_{db} \cdot AgAb_i^* - \lambda_{phy} \cdot AgAb_i^* \\ \frac{d}{dt} Ab_i &= -k_{nonl} \cdot Ab_i + k_{off} \cdot AgAb_i + \frac{F_i}{V_P} \cdot Ab_P - \frac{F_i}{V_i} \cdot Ab_i + \lambda_{phy} \cdot Ab_i^* \\ \frac{d}{dt} Ab_i^* &= -k_{nonl} \cdot Ab_i^* + k_{off} \cdot AgAb_i^* + \frac{F_i}{V_P} \cdot Ab_P^* - \frac{F_i}{V_i} \cdot Ab_i^* - \lambda_{phy} \cdot Ab_i^* \\ \frac{d}{dt} Ab_L &= -k_{nonl} \cdot Ab_L + k_{off} \cdot AgAb_L + \frac{F_L}{V_P} \cdot Ab_P + \frac{F_{GI}}{V_{GI}} \cdot Ab_{GI} + \frac{F_S}{V_S} \cdot Ab_S \\ &\quad - \frac{F_L + F_{GI} + F_S}{V_L} \cdot Ab_L + \lambda_{phy} \cdot Ab_i^* \\ \frac{d}{dt} Ab_L^* &= -k_{nonl} \cdot Ab_L^* + k_{off} \cdot AgAb_L^* + \frac{F_L}{V_P} \cdot Ab_P^* + \frac{F_{GI}}{V_{GI}} \cdot Ab_{GI}^* + \frac{F_S}{V_S} \cdot Ab_S^* \\ &\quad - \frac{F_L + F_{GI} + F_S}{V_L} \cdot Ab_L^* - \lambda_{phy} \cdot Ab_i^* \\ \frac{d}{dt} Ab_P &= -\sum_i \frac{F_i}{V_P} \cdot Ab_P + \frac{F_L + F_{GI} + F_S}{V_L} \cdot Ab_L + \frac{F_{Ly}}{V_{Ly}} \cdot Ab_{Ly} + \frac{F_{RM}}{V_{RM}} \cdot Ab_{RM} - \lambda_{du} \cdot Ab_P + \lambda_{phy} \cdot Ab_P^* \\ \frac{d}{dt} Ab_P^* &= -\sum_i \frac{F_i}{V_P} \cdot Ab_P^* + \frac{F_L + F_{GI} + F_S}{V_L} \cdot Ab_L^* + \frac{F_{Ly}}{V_{Ly}} \cdot Ab_{Ly}^* + \frac{F_{RM}}{V_{RM}} \cdot Ab_{RM}^* - \lambda_{du} \cdot Ab_P^* - \lambda_{phy} \cdot Ab_P^* \\ \text{with } k_{nonl} &= \frac{k_{on} \cdot (Ag_i - AgAb_i^* - AgAb_i)}{V_i} \end{aligned}$$

The following submodel for degraded antibody (<sup>111</sup>In-DTPA and <sup>111</sup>In-low molecular weight biodistribution) was adopted from Eger et al. (1). The variables are defined in Table A.

$$\frac{d}{dt} Ex = \lambda_{du} \cdot Ab_p - \lambda_{clex} \cdot Ex + \lambda_{phy} \cdot Ex^*$$

$$\frac{d}{dt} Ex^* = \lambda_{du} \cdot Ab_p^* - \lambda_{clex} \cdot Ex^* - \lambda_{phy} \cdot Ex^*$$

$$\begin{aligned} \frac{d}{dt} Meta_p &= \lambda_{clex} \cdot Ex - \lambda_{cl} \cdot Meta_p - \lambda_{Metaex1} \cdot Meta_p + \lambda_{Metaex2} \cdot Meta_{ex1} \\ &+ \lambda_{db} \cdot \sum_i AgAb_i + \lambda_{phy} \cdot Meta_p^* \end{aligned}$$

$$\begin{aligned} \frac{d}{dt} Meta_p^* &= \lambda_{clex} \cdot Ex^* - \lambda_{cl} \cdot Meta_p^* - \lambda_{Metaex1} \cdot Meta_p^* + \lambda_{Metaex2} \cdot Meta_{ex1}^* \\ &+ \lambda_{db} \cdot \sum_i AgAb_i^* - \lambda_{phy} \cdot Meta_p^* \end{aligned}$$

$$\frac{d}{dt} Meta_{ex1} = \lambda_{Metaex1} \cdot Meta_p - (\lambda_{Metaex2} + \lambda_{Metaex3}) \cdot Meta_{ex1} + \lambda_{Metaex4} \cdot Meta_{ex2} + \lambda_{phy} \cdot Meta_{ex1}^*$$

$$\frac{d}{dt} Meta_{ex1}^* = \lambda_{Metaex1} \cdot Meta_p^* - (\lambda_{Metaex2} + \lambda_{Metaex3}) \cdot Meta_{ex1}^* + \lambda_{Metaex4} \cdot Meta_{ex2}^* - \lambda_{phy} \cdot Meta_{ex1}^*$$

$$\frac{d}{dt} Meta_{ex2} = \lambda_{Metaex3} \cdot Meta_{ex1} - \lambda_{Metaex4} \cdot Meta_{ex2} + \lambda_{phy} \cdot Meta_{ex2}^*$$

$$\frac{d}{dt} Meta_{ex2}^* = \lambda_{Metaex3} \cdot Meta_{ex1}^* - \lambda_{Metaex4} \cdot Meta_{ex2}^* - \lambda_{phy} \cdot Meta_{ex2}^*$$

### Blood volume according to standard formula

The blood volumes estimated by fitting the data to the model were compared to values determined as follows (2) (BW = body weight in kg).

males

$$V = 0.0411/\text{kg} \cdot \text{BW} + 1.531$$

females

$$V = 0.0471/\text{kg} \cdot \text{BW} + 0.861$$

**TABLE A. Parameter definitions**

|            | Variable                                                | Value                          | Unit                              | Source |
|------------|---------------------------------------------------------|--------------------------------|-----------------------------------|--------|
| $k_{on}$   | association rate                                        | estimated                      | $l \cdot mol^{-1} \cdot min^{-1}$ |        |
| $K_D$      | dissociation constant                                   | estimated                      | $nmol \cdot l^{-1}$               |        |
| $k_{off}$  | dissociation rate                                       | $k_{off} = k_{on} \cdot K_D$   | $min^{-1}$                        |        |
| $k_{nonl}$ | nonlinear association term                              | see definition above           | $min^{-1}$                        |        |
| $F$        | total plasma flow                                       | $= V \cdot 1.23^*$             | $ml \cdot min^{-1}$               |        |
| $F_L$      | liver arterial                                          | $0.065 \cdot F$                | $ml \cdot min^{-1}$               | (3)    |
| $F_S$      | spleen                                                  | $0.03$ Bayes SD $0.02^\dagger$ | $ml \cdot min^{-1}$               | (3)    |
| $F_{GI}$   | GI-tract                                                | $0.16 \cdot F$                 | $ml \cdot min^{-1}$               | (3)    |
| $F_{RM}$   | red marrow                                              | $0.03$ Bayes SD $0.03^\dagger$ | $ml \cdot min^{-1}$               | (3)    |
| $F_{LY}$   | lymph nodes                                             | $0.017 \cdot F$                | $ml \cdot min^{-1}$               | (3)    |
| $V$        | total plasma volume                                     | estimated                      | ml                                |        |
| $V_L$      | liver                                                   | $0.1 \cdot V$                  | ml                                | (3)    |
| $V_S$      | spleen                                                  | $0.014 \cdot V$                | ml                                | (3)    |
| $V_{GI}$   | GI-tract                                                | $0.076 \cdot V$                | ml                                | (3)    |
| $V_{RM}$   | red marrow                                              | $0.04 \cdot V$                 | ml                                | (3)    |
| $V_{LY}$   | lymph nodes                                             | $0.002 \cdot V$                | ml                                | (3)    |
| $V_P$      | total plasma minus organs                               | $V \cdot (1 - 0.232)$          | ml                                |        |
| $Ag_i$     | antigens of organ i                                     | estimated                      | mol                               |        |
| $AgAb_i$   | bound antibody of organ i                               |                                | mol                               |        |
| $Ab_i$     | unbound antibody of organ i                             |                                |                                   |        |
| $Ex$       | degraded antibody in e.v. $^\ddagger$ delay compartment |                                | mol                               | (1)    |
| $Meta_P$   | degraded antibody in plasma                             |                                | mol                               | (4)    |

|                     |                                              |                      |                   |     |
|---------------------|----------------------------------------------|----------------------|-------------------|-----|
| $Meta_{ex1}$        | degraded antibody in e.v.1 <sup>‡</sup>      |                      | mol               | (4) |
| $Meta_{ex2}$        | degraded antibody in e.v.2 <sup>‡</sup>      |                      | mol               | (4) |
| $\lambda_{phy}$     | physical decay $^{111}\text{In}$             | $1.72 \cdot 10^{-4}$ | $\text{min}^{-1}$ |     |
| $\lambda_{db}$      | degradation of bound antibody                | estimated            | $\text{min}^{-1}$ |     |
| $\lambda_{du}$      | degradation of unbound antibody              | $3.9 \cdot 10^{-4}$  | $\text{min}^{-1}$ | (1) |
| $\lambda_{clex}$    | clearance from e.v. <sup>‡</sup> delay space | $3.9 \cdot 10^{-5}$  | $\text{min}^{-1}$ | (1) |
| $\lambda_{Metaex1}$ | vascular to e.v. 1                           | 0.39                 | $\text{min}^{-1}$ | (4) |
| $\lambda_{Metaex2}$ | e.v. 1 to vascular                           | 0.17                 | $\text{min}^{-1}$ | (4) |
| $\lambda_{Metaex3}$ | e.v. 1 to e.v. 2                             | 0.018                | $\text{min}^{-1}$ | (4) |
| $\lambda_{Metaex4}$ | e.v. 2 to e.v. 1                             | 0.013                | $\text{min}^{-1}$ | (4) |
| $\lambda_{cl}$      | clearance from body                          | 0.047                | $\text{min}^{-1}$ | (4) |

\* For the average normal adult (blood)  $F = 6500 \text{ ml/min}$  and  $V = 5300 \text{ ml}$ . Therefore, a factor of 1.23 was assigned to account for the changes in total blood flow due to volume changes.

† standard deviation and mean value from Leggett et al. (3)

‡ e.v., extra vascular

## References

1. Eger RR, Covell DG, Carrasquillo JA et al. Kinetic model for the biodistribution of an  $^{111}\text{In}$ -labeled monoclonal antibody in humans. *Cancer Res.* 1987;47:3328-3336.
2. Silbernagl S, Despopoulos A. Taschenatlas der Physiologie. Stuttgart: Thieme; 2003.
3. Leggett RW, Williams LR. A proposed blood circulation model for reference man. *Health Physics.* 1995;69:187-201.
4. Houston AS, Sampson WF, Macleod MA. A compartmental model for the distribution of  $^{113\text{m}}\text{In}$ -DTPA and  $^{99\text{m}}\text{Tc}$ -(Sn)DTPA in man following intravenous injection. *Int J Nucl Med Biol.* 1979;6:85-95.
